# Supplementary material for: Discrimination of homocysteine, cysteine and glutathione using an aggregation-induced-emission-active hemicyanine dye
Source: Royal Society of Chemistry journal article supplement (doi:10.1039/c4tb00551a), 2014-01-01
Supplement: c4tb00551a1.pdf [file c4tb00551a1.pdf]

Supporting information

## Discrimination of homocysteine, cysteine and glutathione using an aggregation-induced-emission-active hemicyanine dye

Sijie Chen,<sup>a</sup> Yuning Hong,<sup>a</sup> Jianzhao Liu,<sup>a</sup> Nai-Wen Tseng,<sup>a</sup> Yang Liu,<sup>a</sup> Jacky Wing Yip Lam,<sup>a</sup> and Ben Zhong Tang<sup>\*a,b,c</sup>

<sup>a</sup>*Division of Biomedical Engineering, Department of Chemistry, Institute for Advanced Study, Division of Life Science, State Key Laboratory of Molecular Neuroscience, and Institute of Molecular Functional Materials, The Hong Kong University of Science & Technology, Clear Water Bay, Kowloon, Hong Kong, China. E-mail: [tangbenz@ust.hk](mailto:tangbenz@ust.hk) Tel: +852-2358 7375, Fax: +852-2358 1594.*

<sup>b</sup>*Guangdong Innovative Research Team, SCUT-HKUST Joint Research Laboratory, State Key Laboratory of Luminescent Materials and Device, South China University of Technology, Guangzhou, 510640, China* <sup>c</sup>*HKUST-Shenzhen Research Institute, No. 9 Yuexing 1st RD, South Area, Hi-tech Park, Nanshan, Shenzhen, 518057, China.*

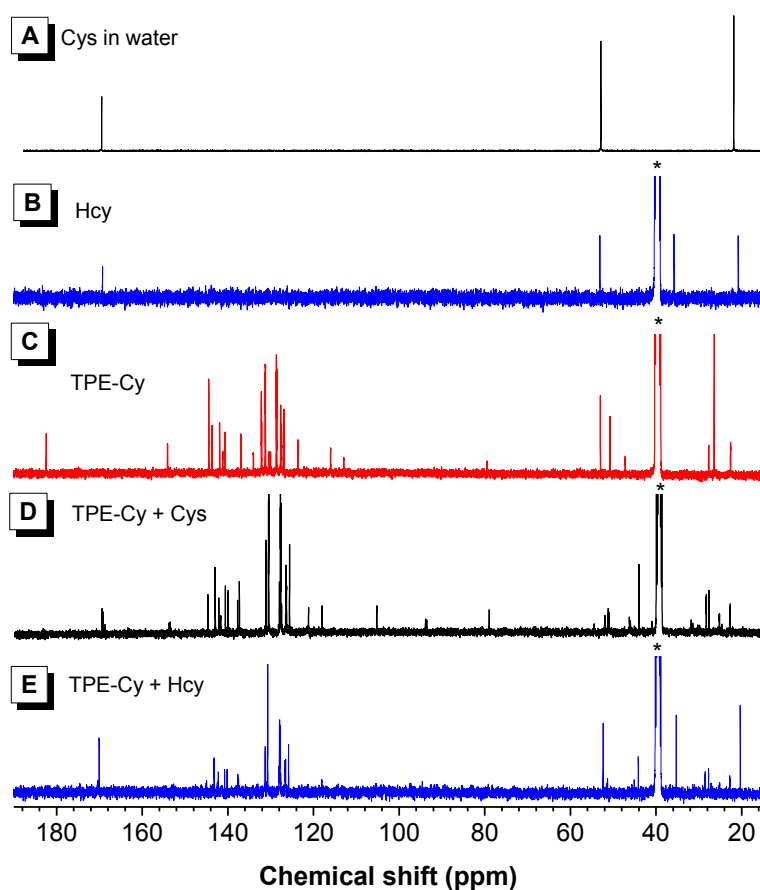

**Fig S1.** <sup>13</sup>C NMR spectra of (A) Cys in D<sub>2</sub>O and (B) Hcy, (C) TPE-Cy, (D) TPE-Cy with Cys, (E) TPE-Cy with Hcy in DMSO-*d*<sub>6</sub>. The water peaks are marked with asterisks.
